# Supplementary material
Source: publisher site journal article supplement (https://www.dovepress.com/get_supplementary_file.php?f=259801.docx)
Supplement: Supplementary file 1 [file get_supplementary_file.php]

**
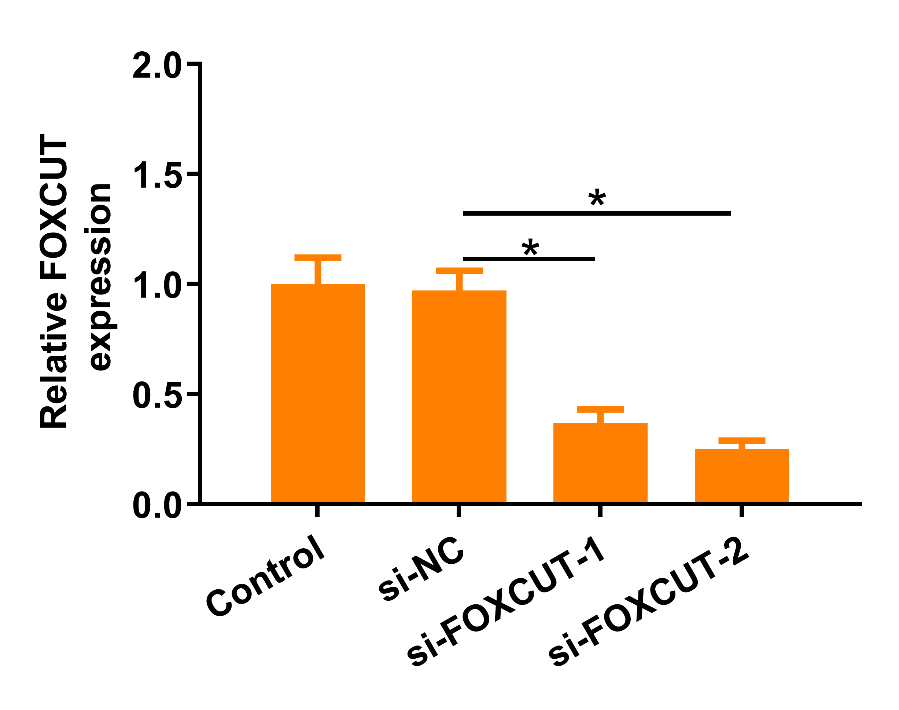
**

**Supplementary Figure S1.** The expression level of FOXCUT was significantly knocked down in FOXCUT siRNA group. The data were represented as the mean ± SD of three independent experiments. **P* < 0.05.


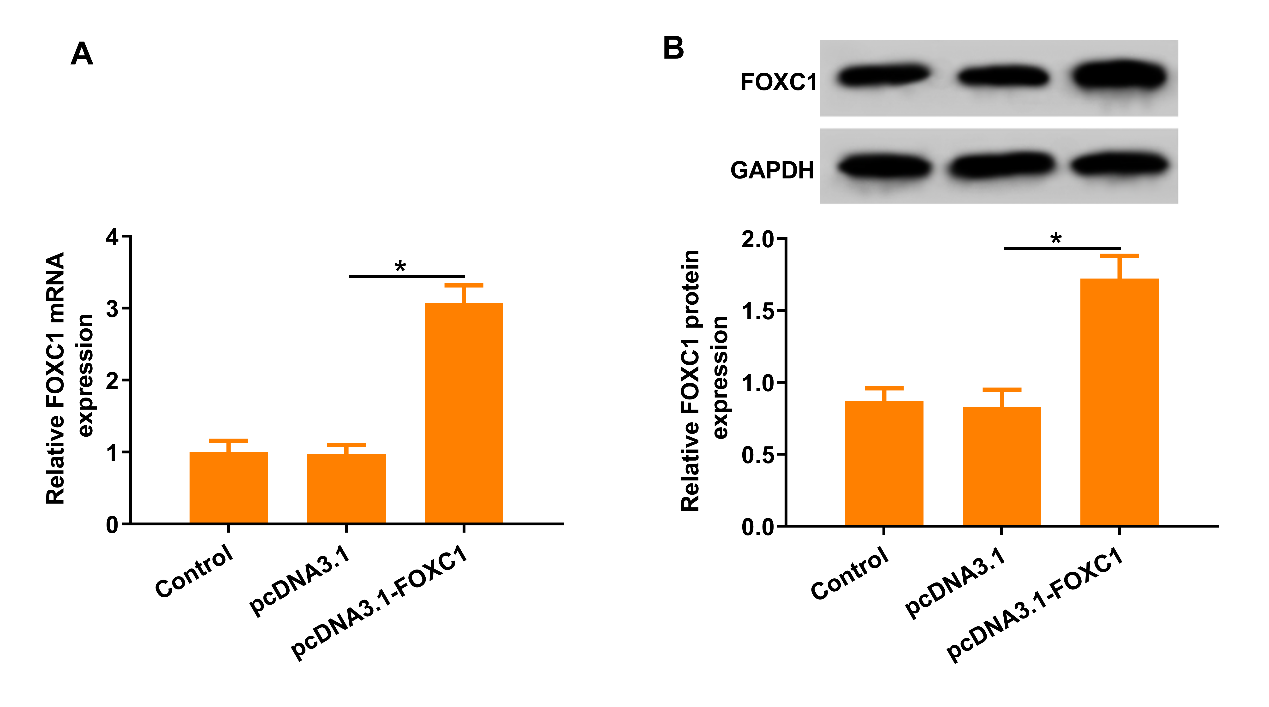


**Supplementary Figure S2.** The expression level of FOXC1 knocked down in mRNA (A) and protein levels (B). The data were represented as the mean ± SD of three independent experiments. **P* < 0.05.
